# Supplementary material for: A long-range emissive mega-Stokes inorganic–organic hybrid material with peripheral carboxyl functionality for As(v) recognition and its application in bioimaging
Source: Royal Society of Chemistry journal article supplement (doi:10.1039/c7dt02387a), 2017-01-01
Supplement: c7dt02387a1.pdf [file c7dt02387a1.pdf]

*Supplementary Information*

**Long-range emissive mega-Stokes inorganic-organic hybrid material with peripheral carboxyl functionality for As (V) recognition and its application in bioimaging**

M. Venkateswarulu,<sup>a</sup>Diksha Gambhir,<sup>a</sup> Harpreet Kaur,<sup>a</sup> P. Vineeth Daniel,<sup>a</sup> Prosenjit Mondal,<sup>a</sup>  
and Rik Rani Koner<sup>b\*</sup>

<sup>a</sup>*School of Basic Sciences, Indian Institute of Technology Mandi, Mandi-175001, H.P, India.*

<sup>b</sup>*School of Engineering, Indian Institute of Technology Mandi, Mandi-175001, H.P, India.*

| <b>S. No</b> | <b>Contents</b>                                                                                                                                                  | <b>No.</b>      |
|--------------|------------------------------------------------------------------------------------------------------------------------------------------------------------------|-----------------|
| 1            | Comparison of potential of PTCA-Cu <sup>2+</sup> towards detection of As <sup>5+</sup> with other reported As <sup>5+</sup> -specific/selective molecular probes | Table S1        |
| 2            | <sup>1</sup> H NMR spectra of Perylene tetracarboxylic acid (PTCA)                                                                                               | Figure S1       |
| 3            | <sup>13</sup> C NMR spectra of PTCA                                                                                                                              | Figure S2       |
| 4            | HRMS spectra of probe PTCA                                                                                                                                       | Figure S3       |
| 5            | HRMS spectra of PTCA-Cu <sup>2+</sup>                                                                                                                            | Figure S4       |
| 6            | Crystal data and structure refinement for PTCA - Cu <sup>+2</sup>                                                                                                | Table S2        |
| 7            | Molecular and Packing diagram of PTCA-Cu <sup>2+</sup>                                                                                                           | Figure S5 to S9 |
| 8            | UV-vis spectra of PTCA-Cu <sup>2+</sup>                                                                                                                          | Figure S10      |
| 9            | Fluorescence spectra of PTCA-Cu <sup>2+</sup> upon the addition of As <sup>5+</sup>                                                                              | Figure S11      |
| 10           | UV-vis and fluorescence spectra of PTCA-Cu <sup>2+</sup> with different analytes                                                                                 | Figure S12      |
| 11           | UV-vis spectra of PTCA-Cu <sup>2+</sup> upon gradual addition of As <sup>5+</sup>                                                                                | Figure S13      |

|    |                                                                                                                                                      |            |
|----|------------------------------------------------------------------------------------------------------------------------------------------------------|------------|
|    |                                                                                                                                                      |            |
| 12 | Fluorescence spectra of PTCA-Cu <sup>2+</sup> upon the gradual addition of As <sup>5+</sup> and at different slit widths                             | Figure S14 |
| 13 | Fluorescence spectra of PTCA-Cu <sup>2+</sup> and H <sub>4</sub> PTCA upon the addition of As <sup>5+</sup> (excitation at 441 and 472 nm)           | Figure S15 |
| 14 | HRMS spectra of PTCA-Cu <sup>2+</sup> upon titrated with Na <sub>2</sub> HAsO <sub>4</sub>                                                           | Figure S16 |
| 15 | Benesi-Hildebrand method for the calculation of binding constant for H <sub>4</sub> PTCA upon gradual addition of Cu <sup>2+</sup> ion solution      | Figure S17 |
| 16 | Benesi-Hildebrand method for the calculation of binding constant for PTCA + Cu <sup>2+</sup> upon gradual addition of As <sup>5+</sup> ion solution. | Figure S18 |
| 17 | Fluorescence response of PTCA-Cu <sup>2+</sup> in presence of As <sup>5+</sup> at different pH values                                                | Figure S19 |
| 18 | Plot of fluorescence intensity of PTCA-Cu <sup>2+</sup> against the concentration of As <sup>5+</sup>                                                | Figure S20 |
| 19 | Fluorescence spectra of PTCA-Cu <sup>2+</sup> (10 μM) in DMSO: River water upon the addition of increasing quantities of As <sup>5+</sup>            | Figure S21 |
| 20 | Fluorescence spectra of PTCA-Cu <sup>2+</sup> (10 μM) in DMSO: Tap water with gradual addition of As <sup>5+</sup>                                   | Figure S22 |
| 21 | Ground-state optimized structure of H <sub>4</sub> PTCA.                                                                                             | Figure S23 |
| 22 | Frontier molecular orbitals of H <sub>4</sub> PTCA                                                                                                   | Figure S24 |
| 23 | Frontier molecular orbitals of PTCA – Cu <sup>2+</sup>                                                                                               | Figure S25 |
| 24 | Optimized structure of the PTCA – As <sup>5+</sup> complex.                                                                                          | Figure S26 |
| 25 | Frontier molecular orbital's of PTCA – As <sup>5+</sup>                                                                                              | Figure S27 |
| 26 | Time dependent-Density Functional Theory (TD-DFT) derived absorption spectra of H <sub>4</sub> PTCA                                                  | Figure S28 |
| 27 | TD-DFT derived absorption spectra of PTCA – Cu <sup>2+</sup>                                                                                         | Figure S29 |
| 28 | TD-DFT derived absorption spectra of PTCA – As <sup>5+</sup>                                                                                         | Figure S30 |
| 29 | Effect of PTCA-Cu <sup>2+</sup> concentration on HepG2 cells viability.                                                                              | Figure S31 |

**Table S1:** Comparison of potential of PTCA-Cu<sup>2+</sup> complex towards As<sup>5+</sup> ion detection with other reported As<sup>5+</sup> ion -specific/selective molecular probes.

| Sensitive dye                                  | Excitation/<br>Emission<br>range                                               | Solvent<br>system                    | Reference                                                                                                                                                 |
|------------------------------------------------|--------------------------------------------------------------------------------|--------------------------------------|-----------------------------------------------------------------------------------------------------------------------------------------------------------|
| APSAL                                          | $\lambda_{\text{ex}} = 350\text{nm}$<br>$\lambda_{\text{em}} = 498\text{ nm}$  | HEPES buffer<br>(Methanol:<br>water) | S. Lohar, A. Sahana, A. Banerjee, A. Banik, S. K. Mukhopadhyay, J. Sanmartín Matalobos and D. Das, <i>Anal. Chem.</i> , 2013, <b>85</b> , 1778–1783.      |
| Arsenofluorl                                   | $\lambda_{\text{ex}} = 385\text{nm}$<br>$\lambda_{\text{em}} = 496\text{ nm}$  | THF                                  | V. C. Ezech and T. C. Harrop, <i>Inorg. Chem.</i> , 2012, <b>51</b> , 1213–1215.                                                                          |
| DFPPIC                                         | $\lambda_{\text{ex}} = 400\text{nm}$<br>$\lambda_{\text{em}} = 530\text{ nm}$  | HEPES buffer                         | S. Nandi, A. Sahana, B. Sarkar, S. K. Mukhopadhyay and D. Das, <i>J. Fluoresc.</i> , 2015, <b>25</b> , 1191–1201.                                         |
| APC                                            | $\lambda_{\text{ex}} = 440\text{nm}$<br>$\lambda_{\text{em}} = 532\text{nm}$   | HEPES buffer                         | A. Banerjee, A. Sahana, S. Lohar, S. Panja, S. K. Mukhopadhyay and D. Das, <i>RSC Adv.</i> , 2013, <b>4</b> , 3887–3892.                                  |
| Cu(II)complex<br>[Cu(n-BuM)(DEA)] <sub>n</sub> | $\lambda_{\text{ex}} = 250\text{nm}$<br>$\lambda_{\text{em}} = 380\text{nm}$   | Aq solution                          | B. Dey, P. Mukherjee, R. K. Mondal, A. P. Chattopadhyay, I. Hauli, S. K. Mukhopadhyay and M. Fleck, <i>Chem. Commun.</i> , 2014, <b>50</b> , 15263–15266. |
| Schiff base                                    | $\lambda_{\text{ex}} = 438\text{ nm}$<br>$\lambda_{\text{em}} = 532\text{ nm}$ | DMSO/H <sub>2</sub> O<br>(1:9)       | S. Lohar, S. Pal, B. Sen, M. Mukherjee, S. Banerjee, and P. Chattopadhyay, <i>Anal. Chem.</i> 2014, <b>86</b> , 11357–11361.                              |
| New Cu(II)complex<br>(PTCA-Cu <sup>2+</sup> )  | $\lambda_{\text{ex}} = 497\text{ nm}$<br>$\lambda_{\text{em}} = 600\text{ nm}$ | HEPES buffer                         | Present Work                                                                                                                                              |

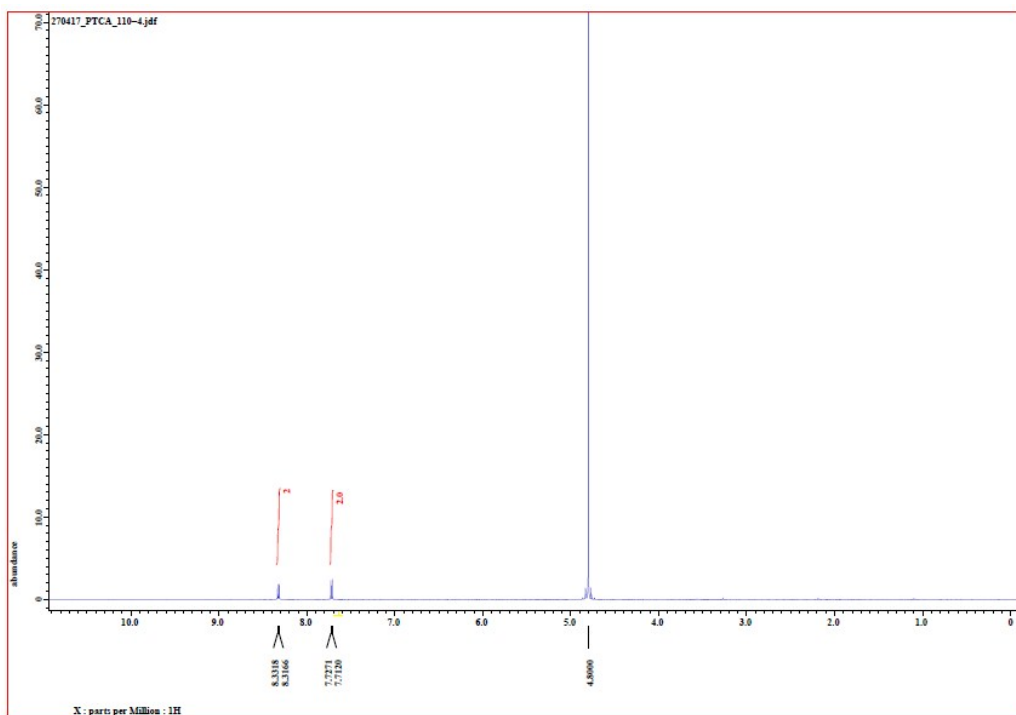

Figure S1.  $^1\text{H}$  NMR spectra of  $\text{H}_4\text{PTCA}$  in  $\text{D}_2\text{O}$ .

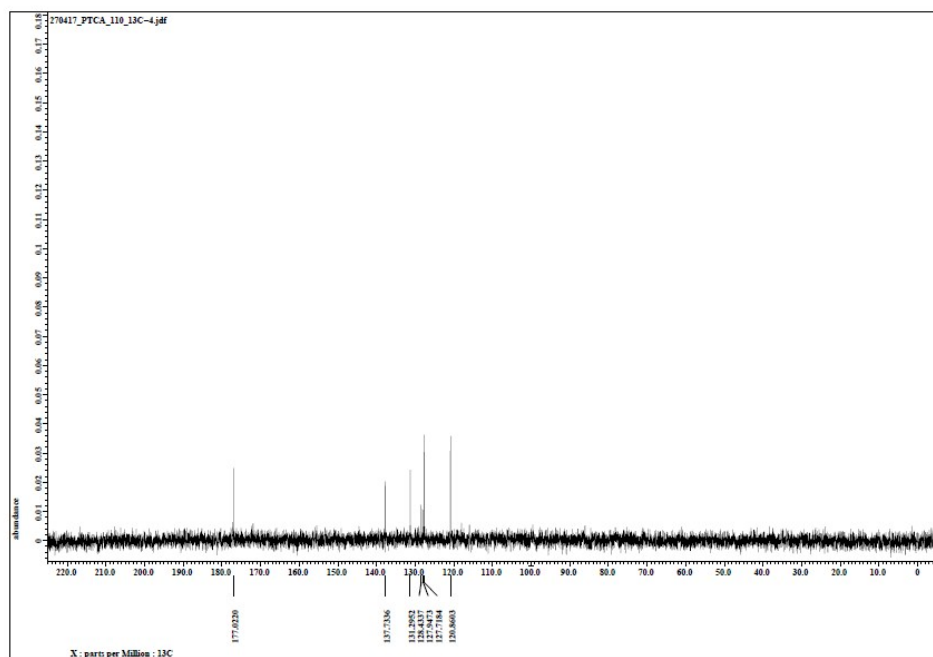

Figure S2.  $^{13}\text{C}$  NMR spectra of  $\text{H}_4\text{PTCA}$  in  $\text{D}_2\text{O}$ .

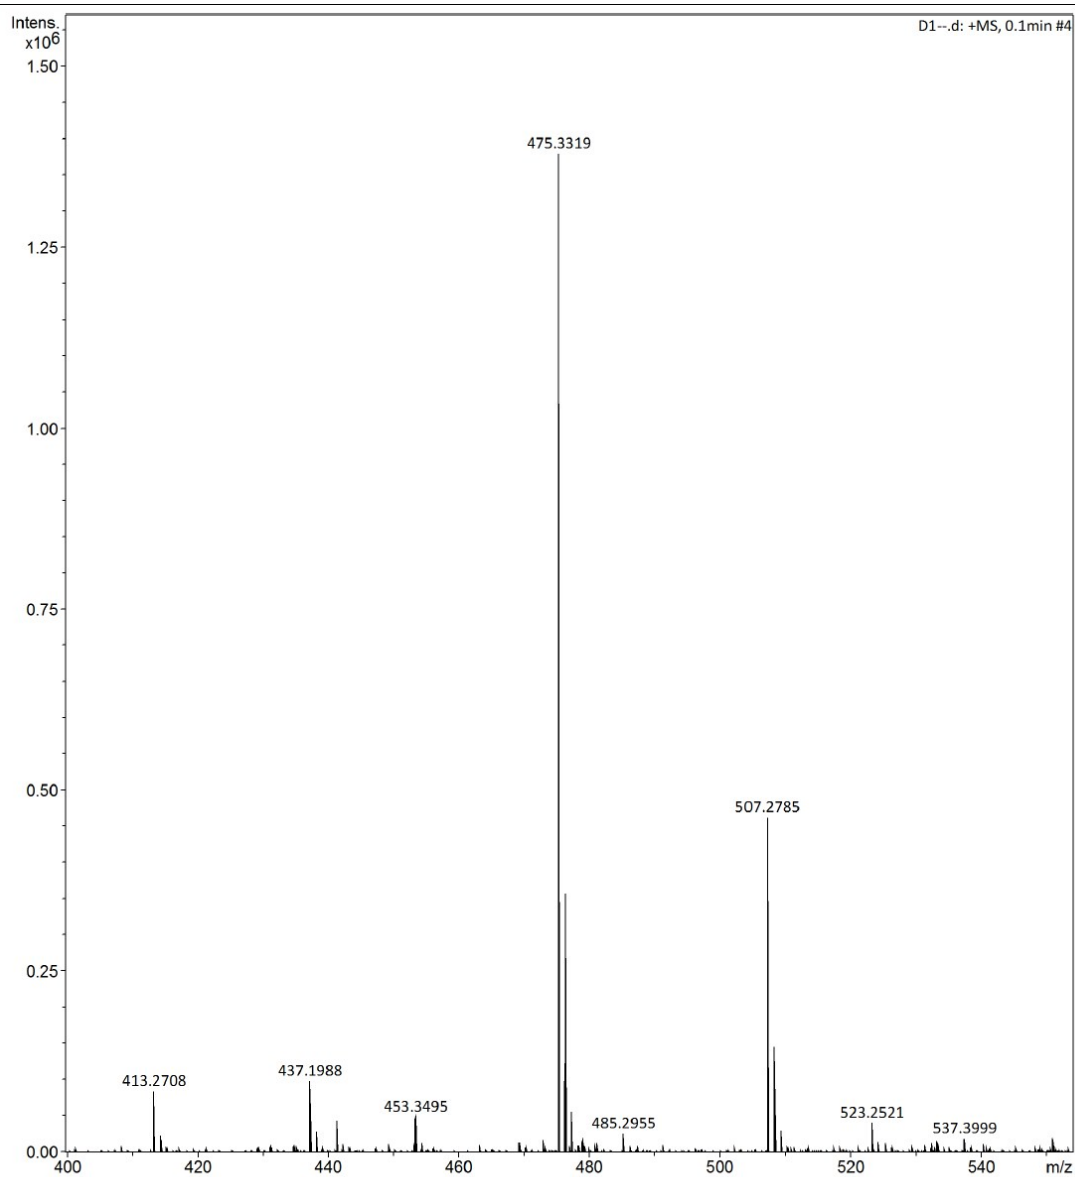

**Figure S3.**HRMS spectra of **H<sub>4</sub>PTCA** in **CH<sub>3</sub>CN**.

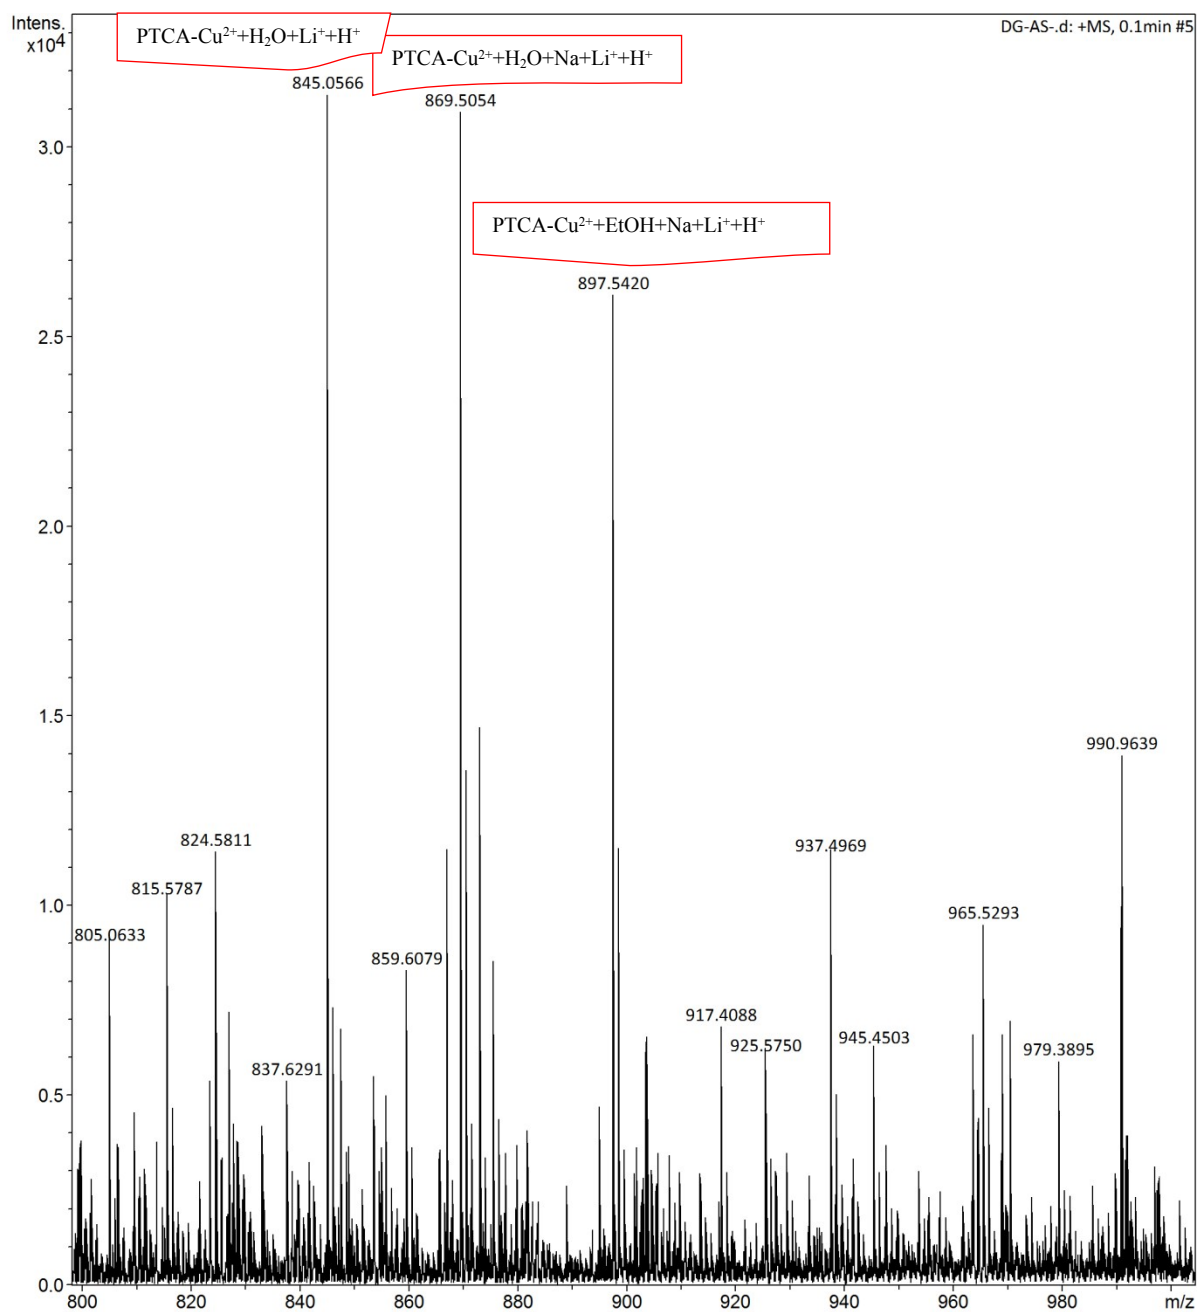

Figure S4.HRMS spectra of PTCA-Cu<sup>2+</sup> in CH<sub>3</sub>CN.

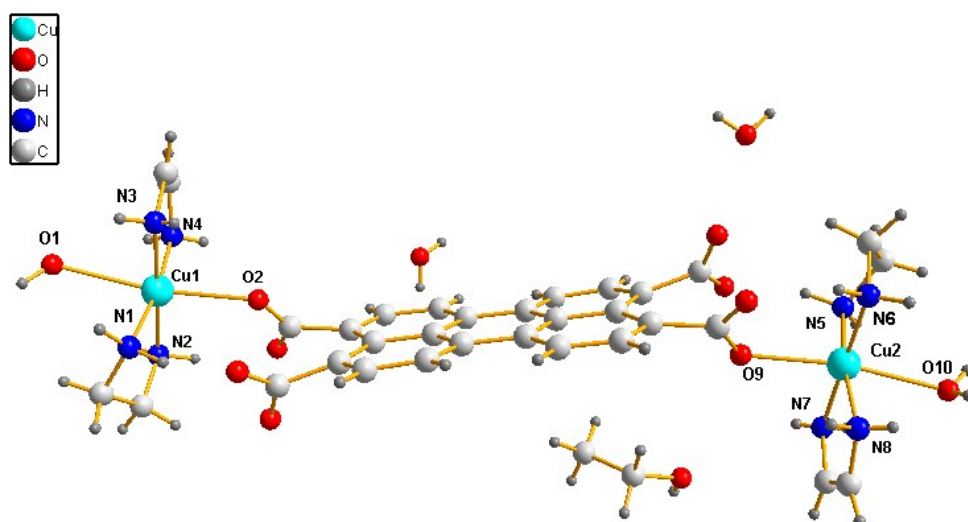

**FigureS5.** Ball and stick view of **PTCA-Cu<sup>2+</sup>** complex.

**Table S2.**Crystal data and Structure Refinement for **PTCA - Cu<sup>2+</sup>**.

|    |                              |                                                                       |
|----|------------------------------|-----------------------------------------------------------------------|
| 1  | Identification code          | <b>PTCA-Cu<sup>2+</sup></b>                                           |
| 2  | Empirical formula            | C <sub>16</sub> H <sub>27</sub> CuN <sub>5</sub> O <sub>9</sub>       |
| 3  | Formula weight               | 496.97                                                                |
| 4  | Temperature/K                | 293(2)                                                                |
| 5  | Crystal system, Space group  | Monoclinic,P2 <sub>1</sub> /c                                         |
| 6  | Unit cell dimension          | a =8.579Å, b= 11.285Å, c = 22.518Å<br>α = 90.14, β = 97.84, γ = 89.93 |
| 7  | Volume/Å <sup>3</sup>        | 2159.6                                                                |
| 8  | Z, Calculated density        | 4                                                                     |
| 9  | F(000)                       | 1036.0                                                                |
| 10 | Crystal size/mm <sup>3</sup> | 0.1341 X 0.1213 X 0.0717                                              |
| 11 | Two Theta range for data     | 8.78 to 133.74                                                        |

|    |                                              |                                                            |
|----|----------------------------------------------|------------------------------------------------------------|
|    | collection                                   |                                                            |
| 12 | Limiting indices(Index ranges)               | $-8 \leq h \leq 10, -13 \leq k \leq 9, -23 \leq l \leq 26$ |
| 13 | Reflections collected / unique               | 7113                                                       |
| 14 | Data/restraints/parameters                   | 3718/4/299                                                 |
| 15 | Goodness of fit on $F^2$                     | 1.030                                                      |
| 16 | Final R indexes [ $I \geq 2\sigma(I)$ ]      | $R_1=0.0432, wR_2= 0.1096$                                 |
| 17 | R indexes [all data]                         | $R_1=0.0452, wR_2= 0.1116$                                 |
| 18 | Largest diff. peak/hole / $e\text{\AA}^{-3}$ | 1.04/-0.63                                                 |

**Table S3.** Selected Bond Lengths ( $\text{\AA}$ ) and angles (deg) of PTCA-Cu<sup>2+</sup> complex.

| <b>Bonds</b> | <b>Distance/Angle</b> |
|--------------|-----------------------|
| O1-Cu1       | 2.552                 |
| O2-Cu1       | 2.415                 |
| N1-Cu1       | 2.01                  |
| N2-Cu1       | 1.99                  |
| N3-Cu1       | 2.02                  |
| N4-Cu1       | 2.00                  |
| O1-Cu1-O2    | 170.79                |
| N1-Cu1-N2    | 84.62                 |
| N3-Cu1-N4    | 84.91                 |
| N1-Cu1-N3    | 95.11                 |
| N2-Cu1-N4    | 95.17                 |



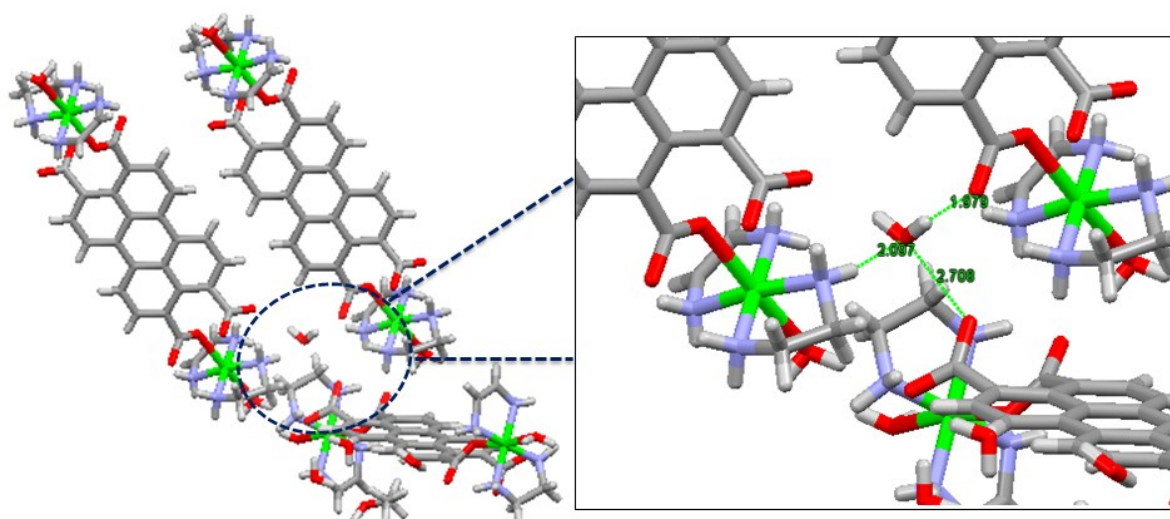

**Figure S6.** Hydrogen bond between the uncoordinated carboxylate oxygen , aqua molecule and NH of the ethylene diamine unit.

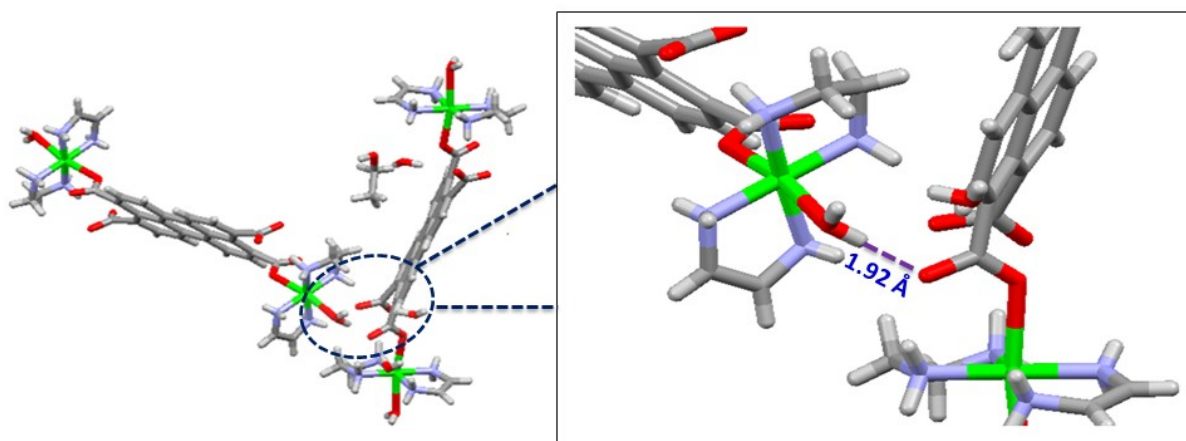

**Figure S7.** The carboxylate unit forms hydrogen bond with coordinated aqua molecule (Cu—H<sub>2</sub>O·····OOC-Cu).

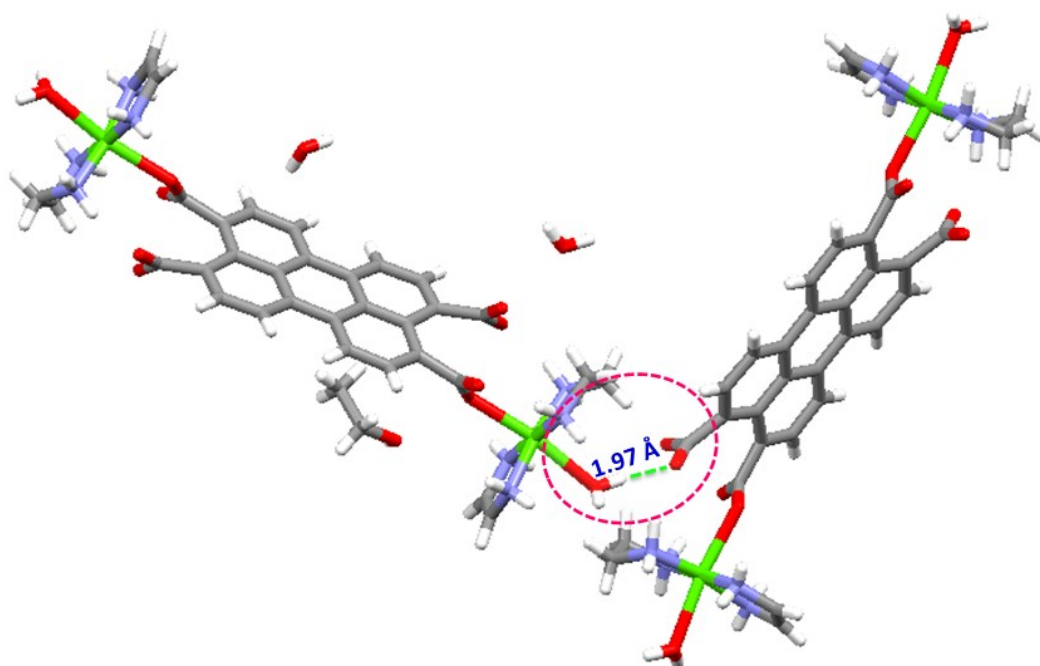

**Figure S8.** The free carboxylate unit forms hydrogen bonds with coordinated aqua molecule ( $\text{Cu}-\text{H}_2\text{O}\cdots\text{OOC}^-$ ) of neighbouring unit.

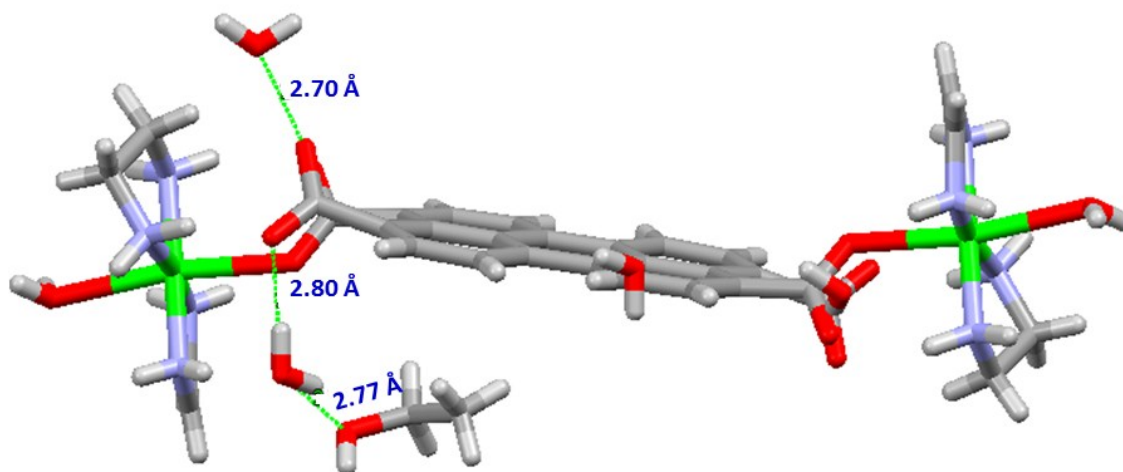

**Figure S9.** Hydrogen bonds between the uncoordinated carboxylate and solvent molecules.

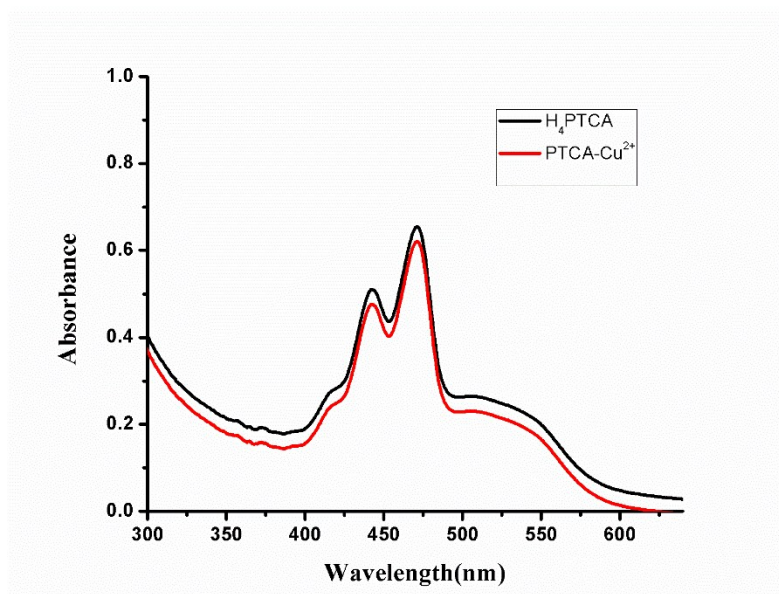

**Figure S10:** UV-vis spectra of  $H_4PTCA$  and  $PTCA-Cu^{2+}$  ( $10\mu M$ ) in DI  $H_2O$  buffered with HEPES (1mM), pH = 7.2.

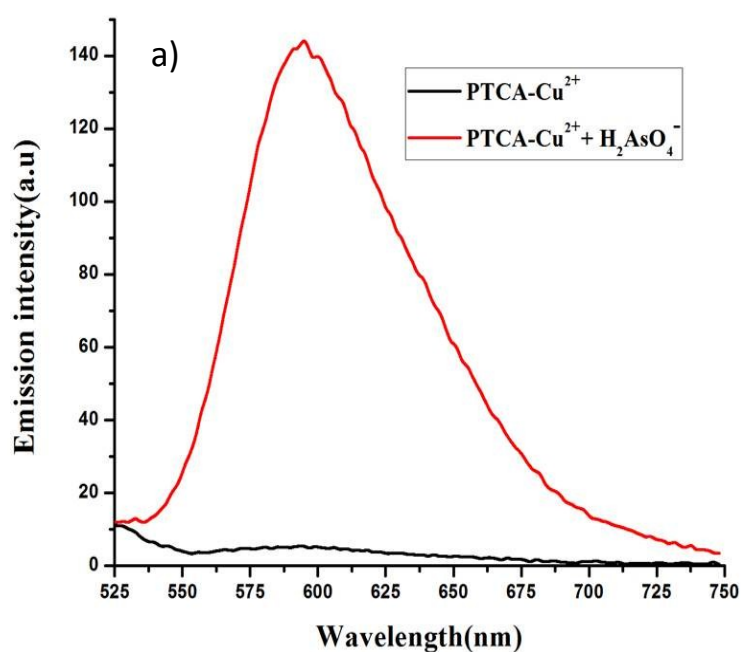

**Figure S11.** Fluorescence spectra of  $PTCA-Cu^{2+}$  ( $10\mu M$ ) in DI  $H_2O$  buffered with HEPES (1 mM), pH = 7.2 upon the addition of  $As^{5+}$  ( $166\mu M$ ) (excitation at 497 nm and emission at 600 nm and slit width 5/10)

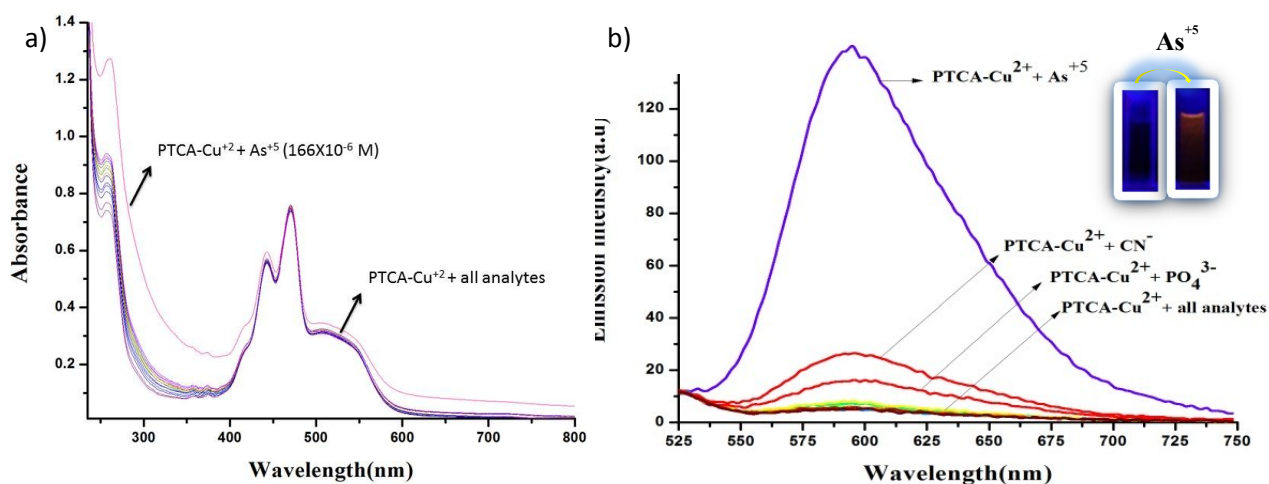

**Figure S12a).** UV-vis spectra and **b)** Fluorescence spectra of  $\text{PTCA-Cu}^{2+}$  ( $10\mu\text{M}$ ) in DI  $\text{H}_2\text{O}$  buffered with HEPES ( $1\text{ mM}$ ),  $\text{pH} = 7.2$  upon the addition of  $166\ \mu\text{M}$  different anions ( $\text{Cl}^-$ ,  $\text{F}^-$ ,  $\text{Br}^-$ ,  $\text{HSO}_4^-$ ,  $\text{CN}^-$ ,  $\text{NO}_3^-$ ,  $\text{PO}_4^{3-}$ ,  $\text{ClO}_4^-$  and  $\text{CH}_3\text{COO}^-$ ) and cations ( $\text{As}^{3+}$ ,  $\text{As}^{5+}$ ,  $\text{Li}^+$ ,  $\text{Na}^+$ ,  $\text{K}^+$ ,  $\text{Ca}^{2+}$ ,  $\text{Mg}^{2+}$ ,  $\text{Fe}^{2+}$ ,  $\text{Fe}^{3+}$ ,  $\text{Mn}^{2+}$ ,  $\text{Co}^{2+}$ ,  $\text{Ni}^{2+}$ ,  $\text{Cd}^{2+}$ ,  $\text{Hg}^{2+}$ ,  $\text{Zn}^{2+}$ ,  $\text{Sn}^{2+}$ ,  $\text{Sr}^{2+}$ ,  $\text{Al}^{3+}$ ,  $\text{Cr}^{3+}$ ,  $\text{Bi}^{2+}$ ,  $\text{Sb}^{2+}$ ).

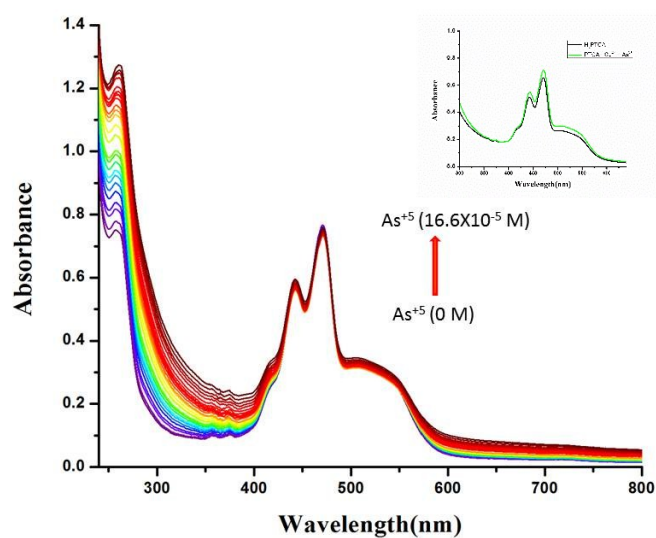

**Figure S13.** UV-vis spectra of  $\text{PTCA-Cu}^{2+}$  ( $10\mu\text{M}$ ) in DI  $\text{H}_2\text{O}$  buffered with HEPES ( $1\text{ mM}$ ),  $\text{pH} = 7.2$  upon the addition of increasing quantities of  $\text{As}^{5+}$  ( $0$  to  $166\ \mu\text{M}$ ) (**inset:** UV-vis spectra of  $\text{H}_4\text{PTCA}$  and upon addition of  $\text{As}^{5+}$ ).

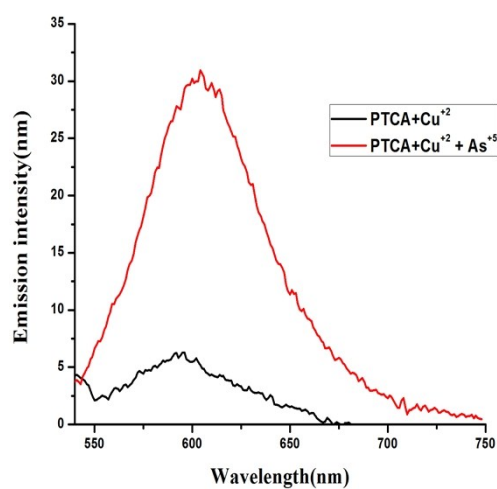

c)

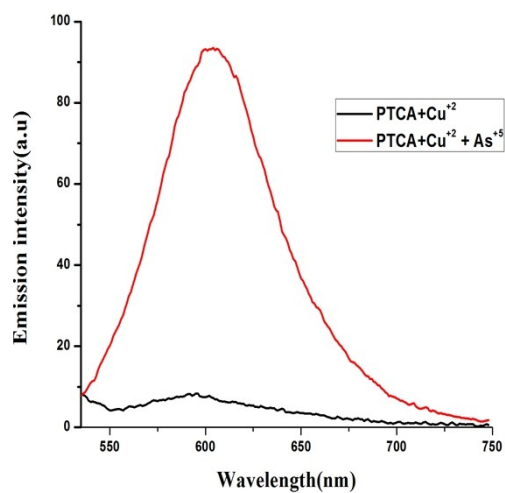

d)

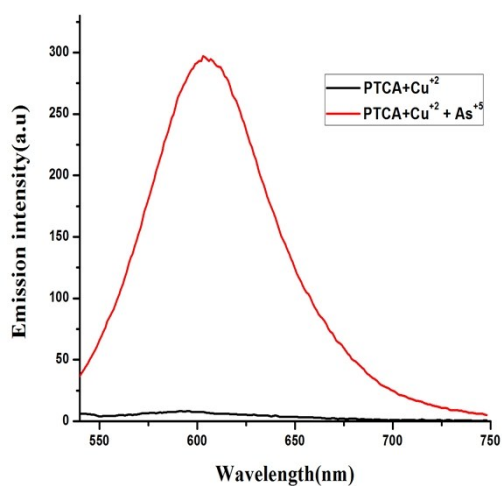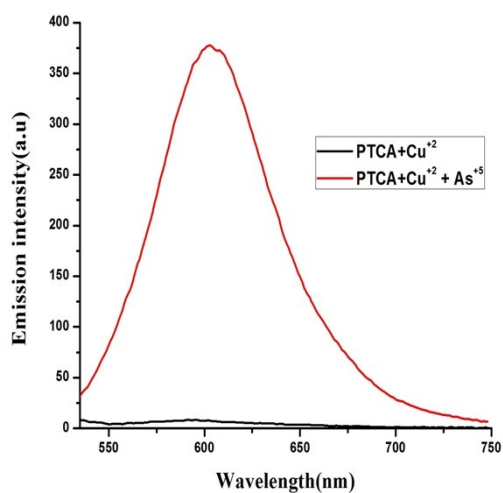

**Figure S14a-d.** Fluorescence spectra of PTCA-Cu<sup>2+</sup> (10 μM) in DI H<sub>2</sub>O buffered with HEPES (1 mM), pH = 7.2 upon the addition of As<sup>5+</sup> (166 μM) (excitation at 497 nm and emission at 600 nm and slit width 5/5, 10/5, 5/20 and 10/10 respectively).

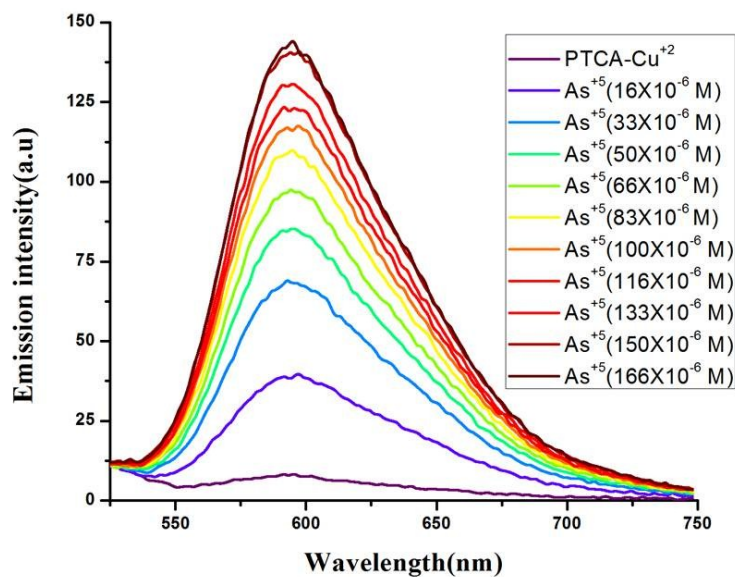

**Figure S14e.** Fluorescence spectra of PTCA-Cu<sup>2+</sup> (10 μM) in DI H<sub>2</sub>O buffered with HEPES (1 mM), pH = 7.2 upon the addition of increasing quantities of As<sup>5+</sup> (0 to 166 μM) (excitation at 497 nm and emission at 600 nm and slit width 5/10).

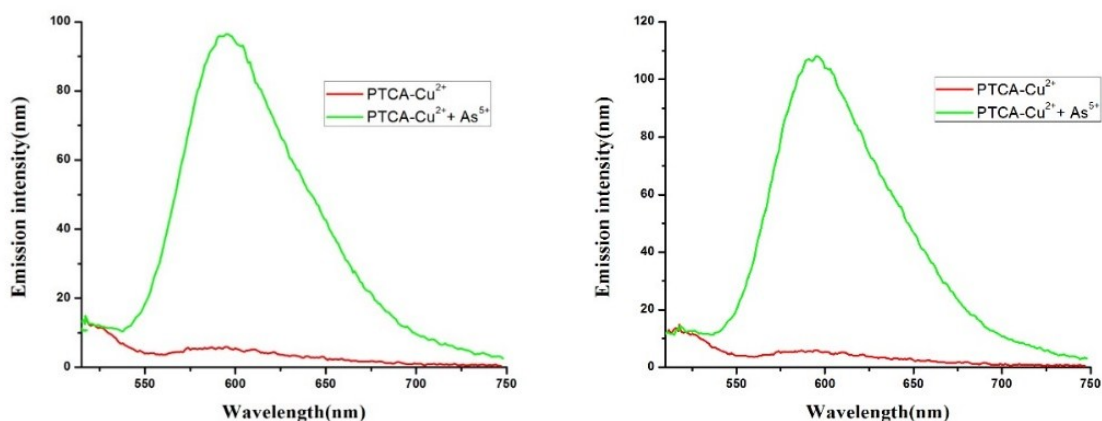

**Figure S15a.** Fluorescence spectra of PTCA-Cu<sup>2+</sup> (10 μM) in DI H<sub>2</sub>O buffered with HEPES (1 mM), pH = 7.2 upon the addition of As<sup>5+</sup> ion (0 to 166 μM) (excitation at 441 nm and 472 nm respectively and emission at 600 nm)



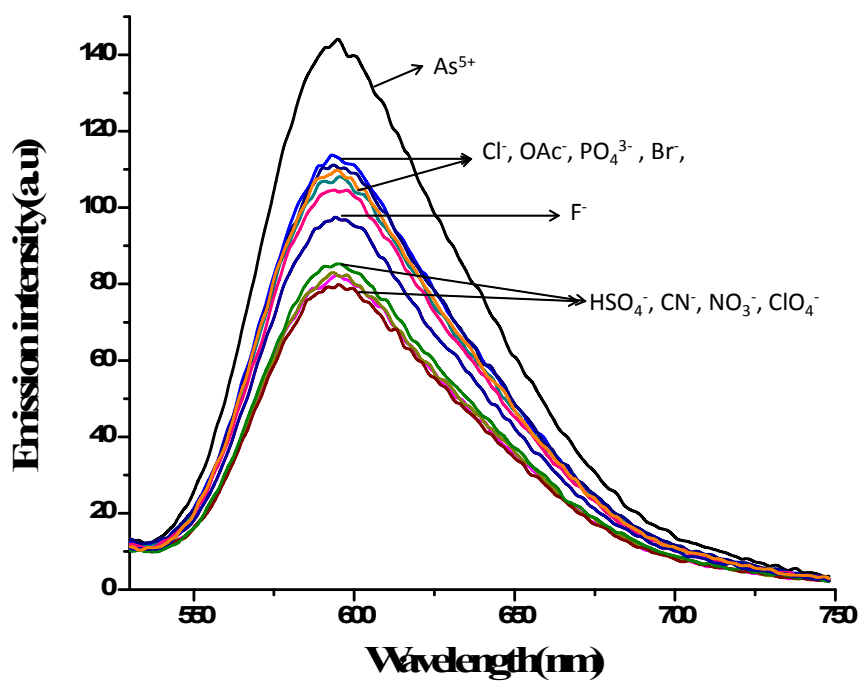

**Figure S15b.** Emission spectra of  $\text{H}_4\text{PTCA}$  ( $10 \mu\text{M}$ ) in  $\text{H}_2\text{O}$  buffered with HEPES ( $1 \text{ mM}$ ),  $\text{pH} = 7.2$  upon the addition of  $166 \mu\text{M}$  different anions ( $\text{Cl}^-$ ,  $\text{F}^-$ ,  $\text{Br}^-$ ,  $\text{HSO}_4^-$ ,  $\text{CN}^-$ ,  $\text{NO}_3^-$ ,  $\text{PO}_4^{3-}$ ,  $\text{ClO}_4^-$  and  $\text{CH}_3\text{COO}^-$ ) excitation at  $497 \text{ nm}$  and emission at  $600 \text{ nm}$ .

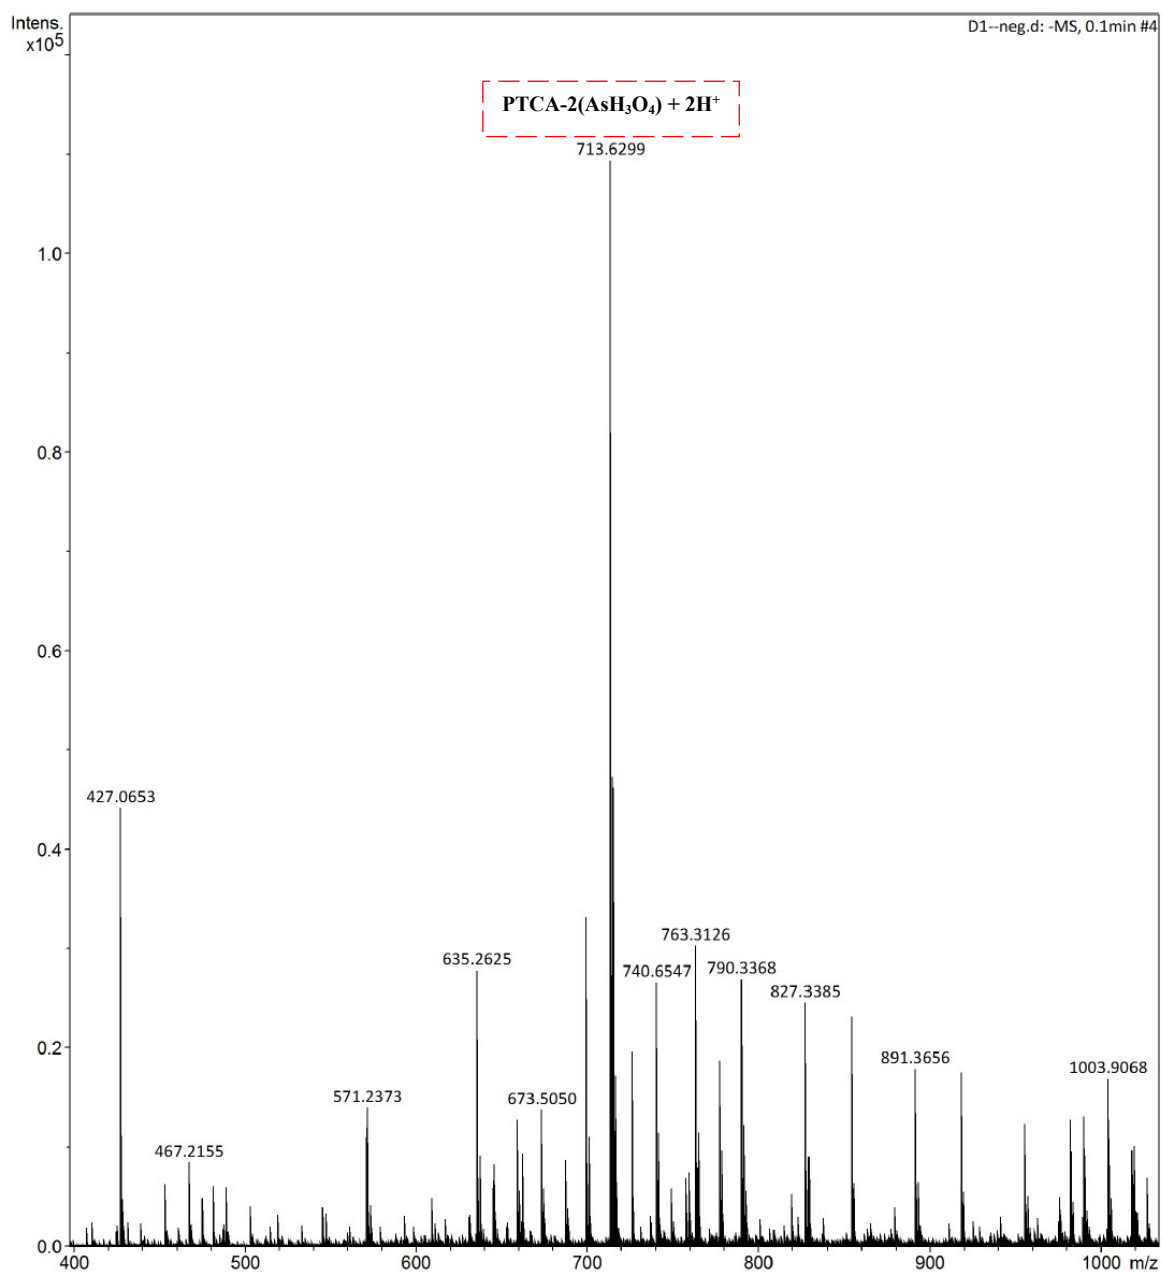

**Figure S16a.** HRMS spectra of PTCA-Cu<sup>+2</sup> upon titrated with Na<sub>2</sub>HAsO<sub>4</sub> in acetonitrile.

(PTCA-2(AsH<sub>3</sub>O<sub>4</sub>)+2H<sup>+</sup>)-C<sub>24</sub>H<sub>20</sub>As<sub>2</sub>O<sub>16</sub><sup>+2</sup> 713.9183.



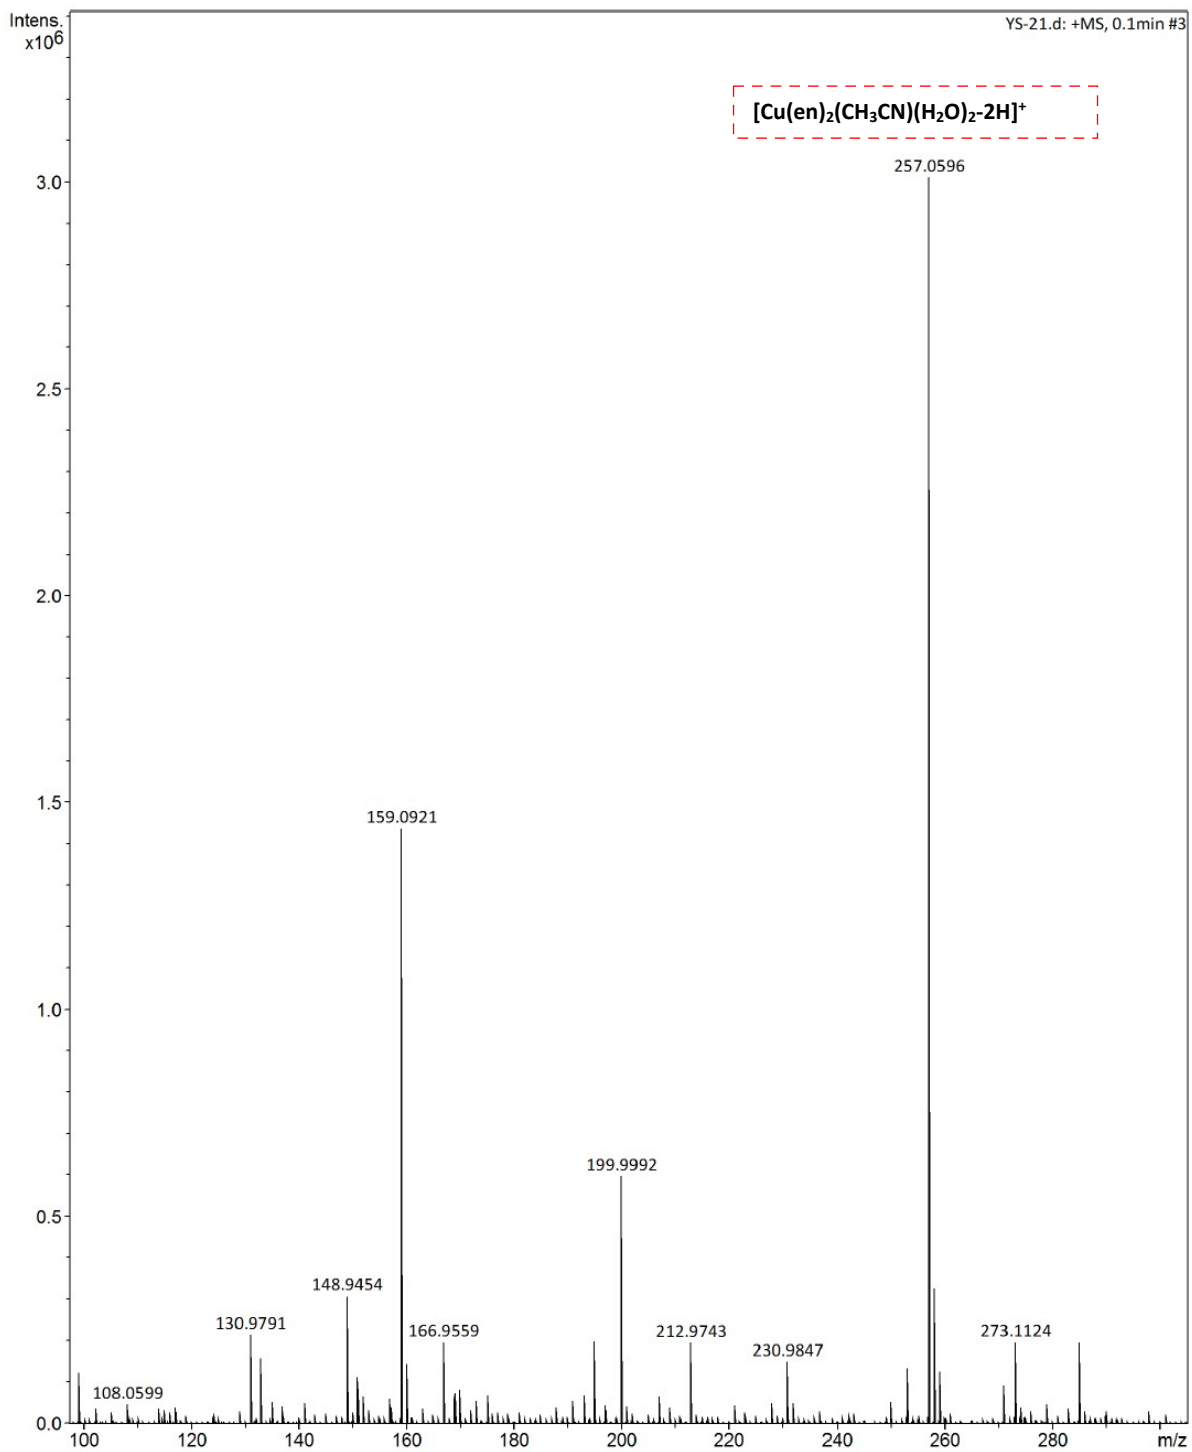

**Figure S16b.**HRMS spectra of PTCA-Cu<sup>+2</sup> upon titrated with Na<sub>2</sub>HAsO<sub>4</sub> in CH<sub>3</sub>CN.

## Binding constant calculation

**Methods for association or stability constant calculation:** Binding properties of **PTCA-Cu<sup>2+</sup>** towards with **As<sup>5+</sup>** complexes were determined by fluorescence titrations. All the measurements were performed by titrating **PTCA-Cu<sup>2+</sup>** with **As<sup>5+</sup>** ion in H<sub>2</sub>O (HEPES buffered, pH ~7.2) at 25°C. Initial concentrations of the **PTCA-Cu<sup>2+</sup>** and **As<sup>5+</sup>** were 10 μM and 1mM, respectively. Each titration was performed by several measurements with varying metal ion concentrations in order to avoid dilution error, and the association constants were calculated using Benesi-Hildebrand method.

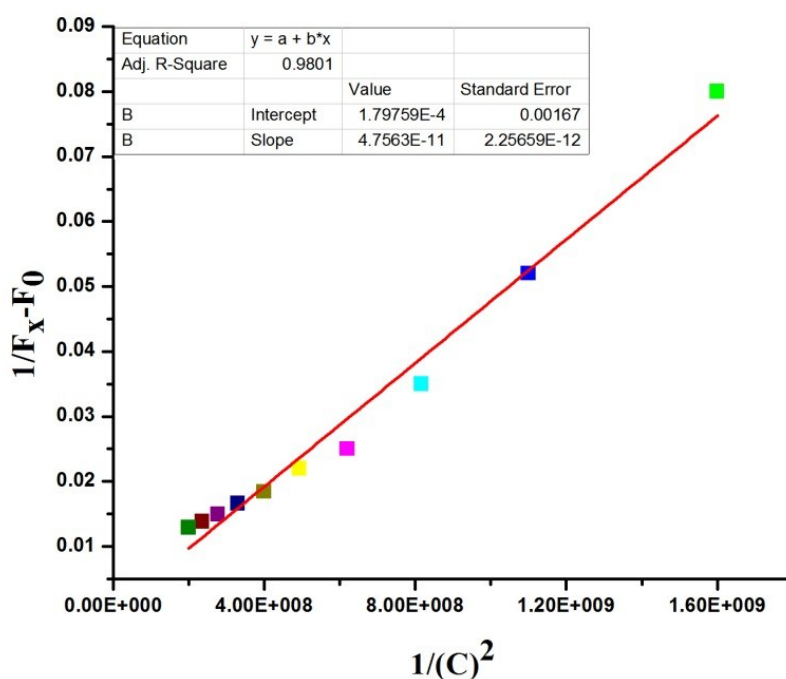

**Figure S17.** Benesi-Hildebrand method for the calculation of binding constant for H<sub>4</sub>PTCA upon gradual addition of Cu<sup>2+</sup> ion solution (Excitation at 497 nm in H<sub>2</sub>O buffered with HEPES (1 mM), pH = 7.2. Solution was incubated for 5 min at 25°C.

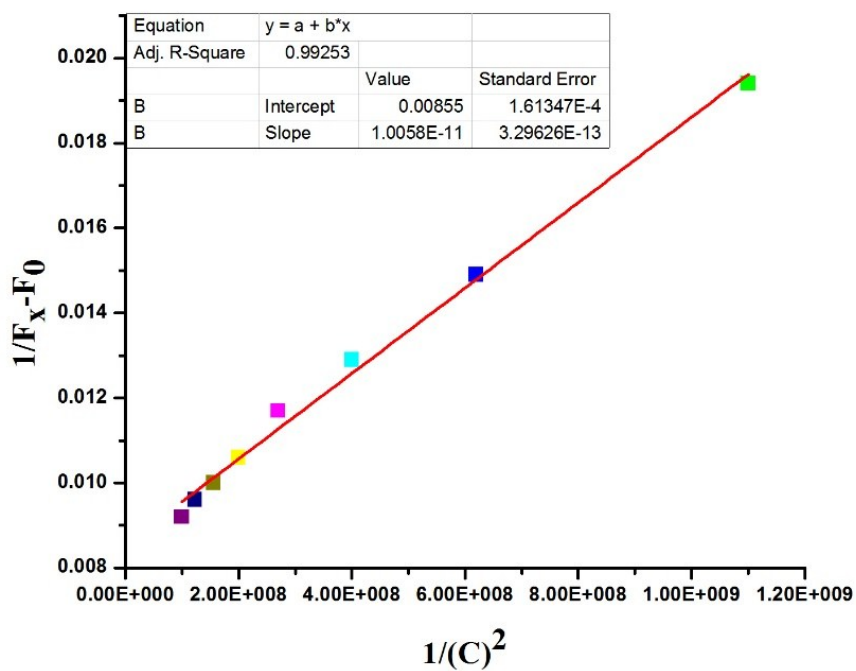

**Figure S18.** Benesi-Hildebrand method for the calculation of binding constant for PTCA+Cu<sup>2+</sup> upon gradual addition of As<sup>+5</sup> ion solution (Excitation at 497 nm in H<sub>2</sub>O buffered with HEPES (1 mM), pH = 7.2. Solution was incubated for 5 min at 25°C.

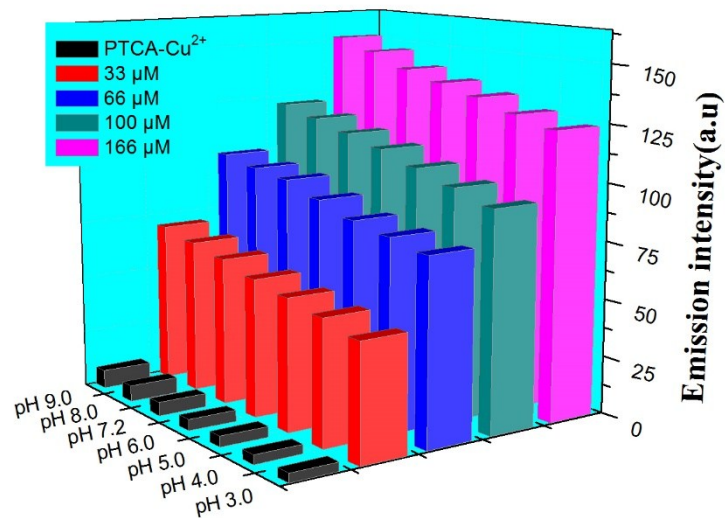

**Figure S19.** Fluorescence response of PTCA-Cu<sup>2+</sup>(10 μM) in H<sub>2</sub>O buffered with HEPES (1 mM) at different pH values ( $\lambda_{\text{exc}} = 497 \text{ nm}$ ) upon addition of different concentrations of Na<sub>2</sub>HAsO<sub>4</sub>.

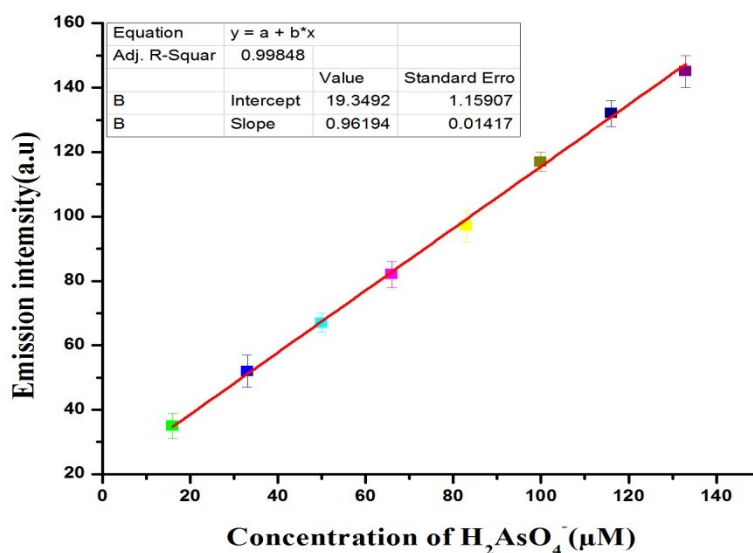

**Figure S20.** Plot of fluorescence intensity of PTCA-Cu<sup>2+</sup>(10 μM) in DI H<sub>2</sub>O buffered with HEPES (1 mM, pH = 7.2), excitation at 497 nm as a function of the concentration of As<sup>5+</sup>.

### Detection of $\text{As}^{5+}$ ion in real samples:

River water and tap water were used as real samples for analysis of  $\text{As}^{5+}$  ion. These real samples used as solvents for the preparation of different concentrations of  $\text{As}^{5+}$  ion standard solutions to record the fluorescence spectra. The detection procedure for river water and tap water is the same as that used above. We are in the process of collecting various real-world samples which contain  $\text{As}^{5+}$  ion and would like to apply our probe in future to detect the presence of those metal ions.

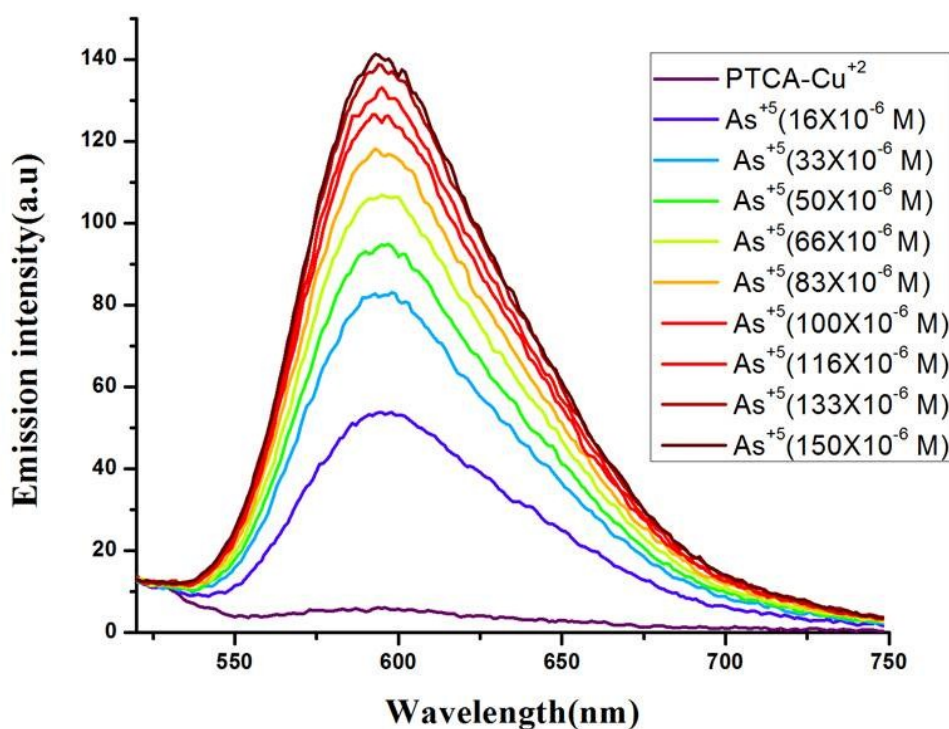

**Figure S21.** Fluorescence spectra of PTCA-Cu<sup>2+</sup> (10 $\mu$ M) in DMSO: River water (, v/v) upon the addition of increasing quantities of As<sup>5+</sup> (0 to 150 $\mu$ M)(excitation at 497 nm and emission at 600 nm). Solution was incubated for 5 min at 25°C.

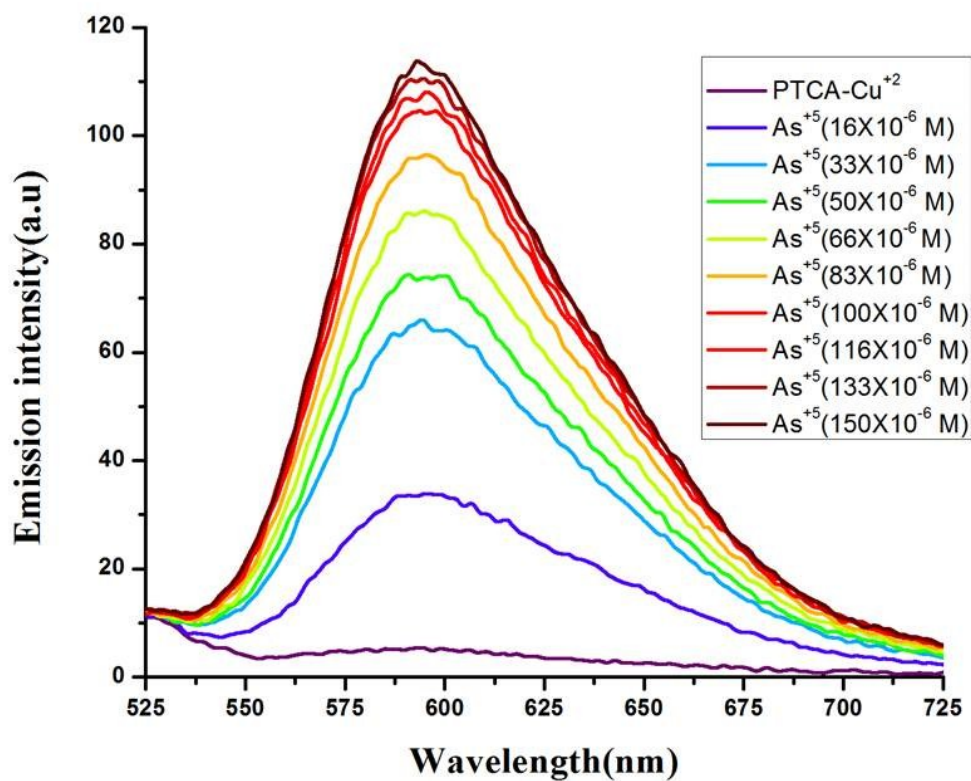

**Figure S22.** Fluorescence spectra of PTCA-Cu<sup>2+</sup> (10 μM) in DMSO: Tap water (, v/v) upon the addition of increasing quantities of As<sup>5+</sup> (0 to 150 μM) (excitation at 497 nm and emission at 600 nm). Solution was incubated for 5 min at 25°C.

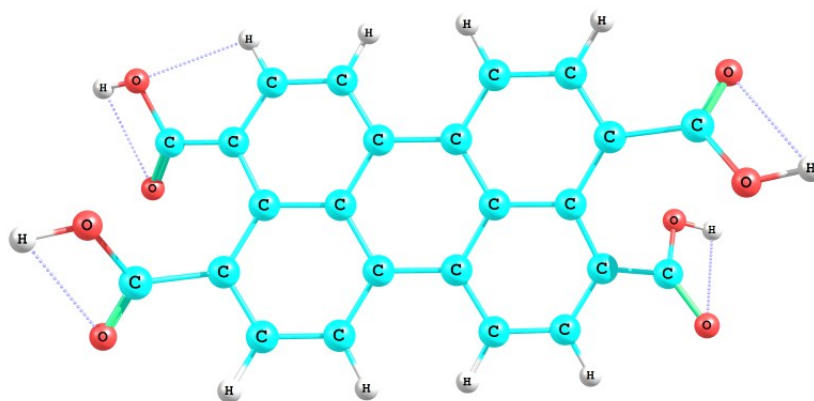

**Figure S23.** Ground-state optimized structure of H<sub>4</sub>PTCA.

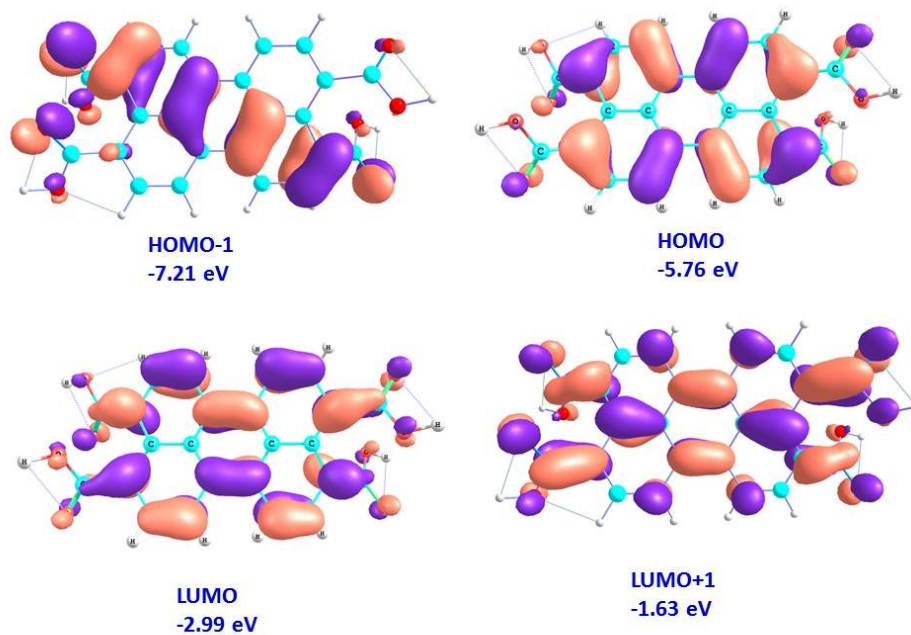

**Figure S24.** Frontier molecular orbital's of  $\text{H}_4\text{PTCA}$  (isocontour at 0.03 au).

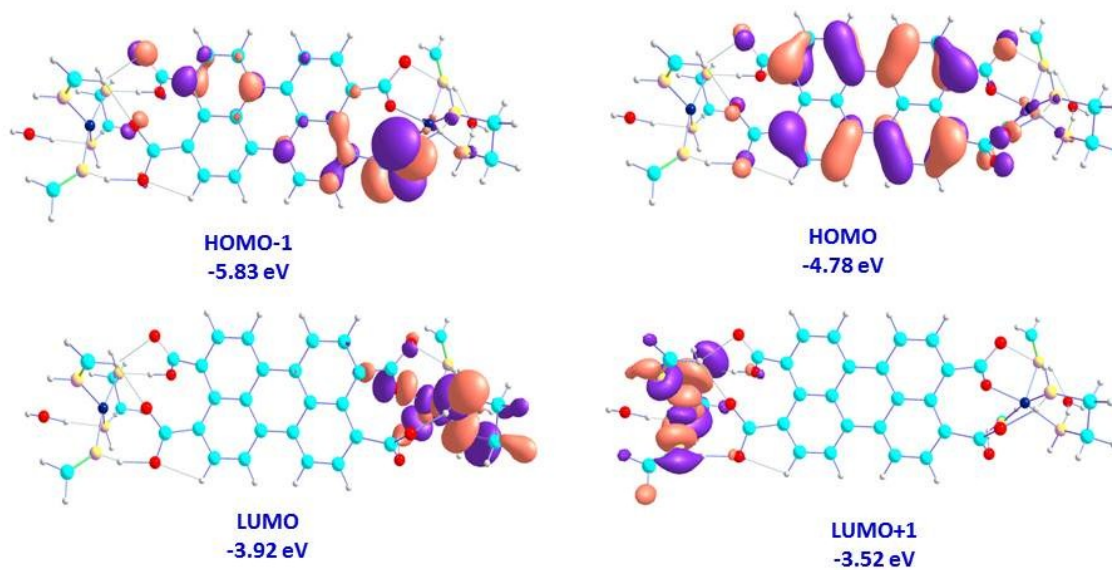

**Figure S25.** Frontier molecular orbitals of  $\text{PTCA-Cu}^{2+}$  complex (isocontour at 0.03 au).



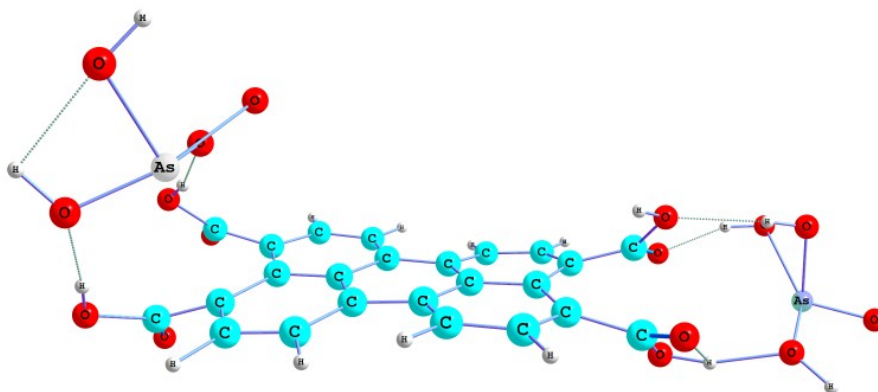

**FigureS26.** Optimized structure of the PTCA –As<sup>5+</sup> complex.

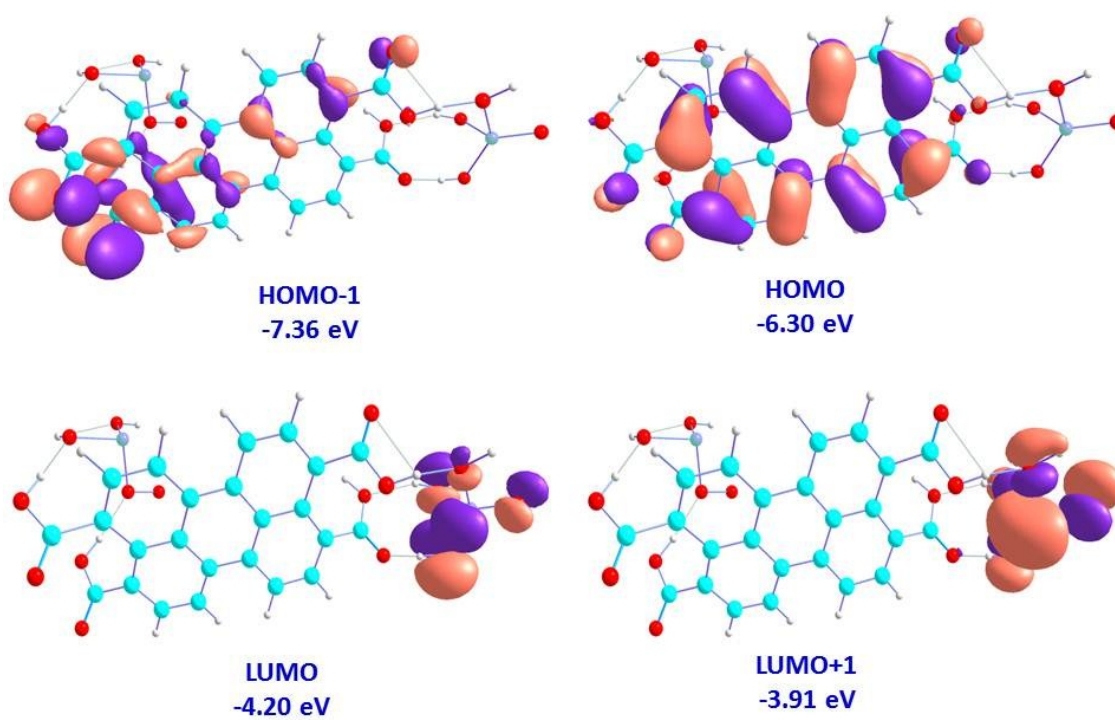

**FigureS27.** Frontier molecular orbitals of PTCA –As<sup>5+</sup> complex (isocontour at 0.03 au).



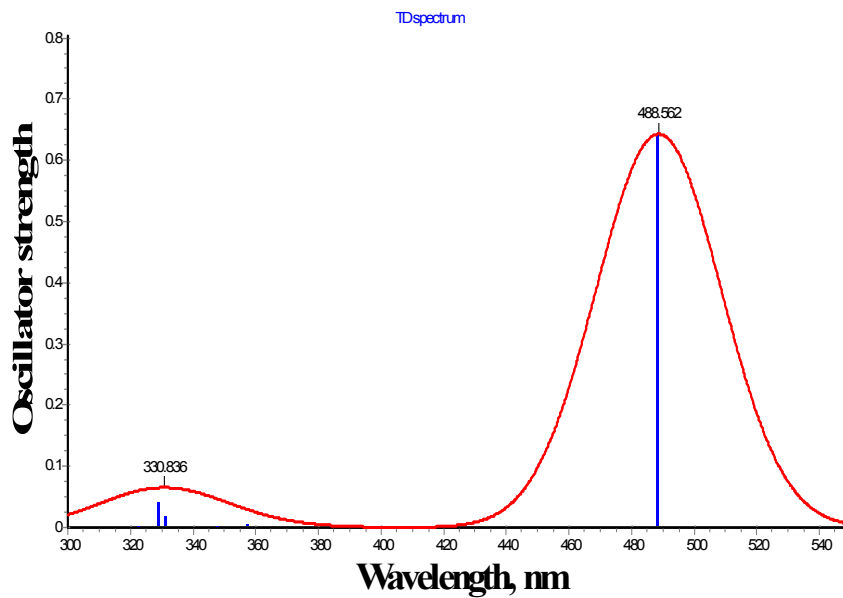

Figure S28. TD-DFT derived absorption spectra of the H<sub>4</sub>PTCA.

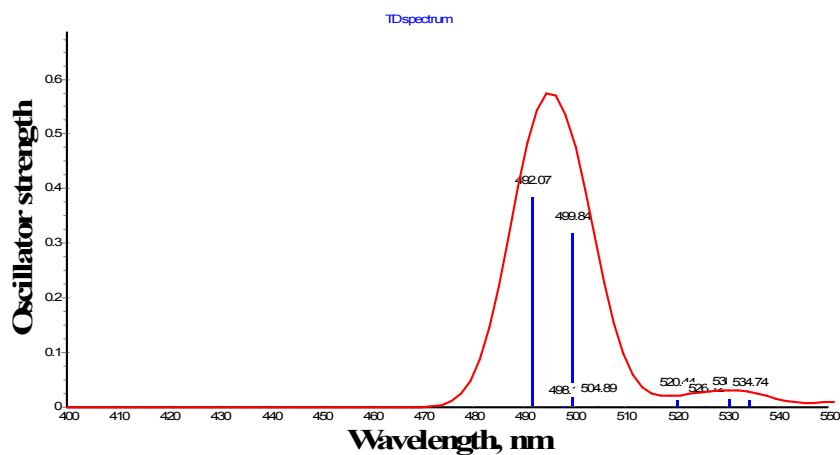

Figure S29. TD-DFT derived absorption spectra of PTCA-Cu<sup>2+</sup> complex (isocontour at 0.03 au).

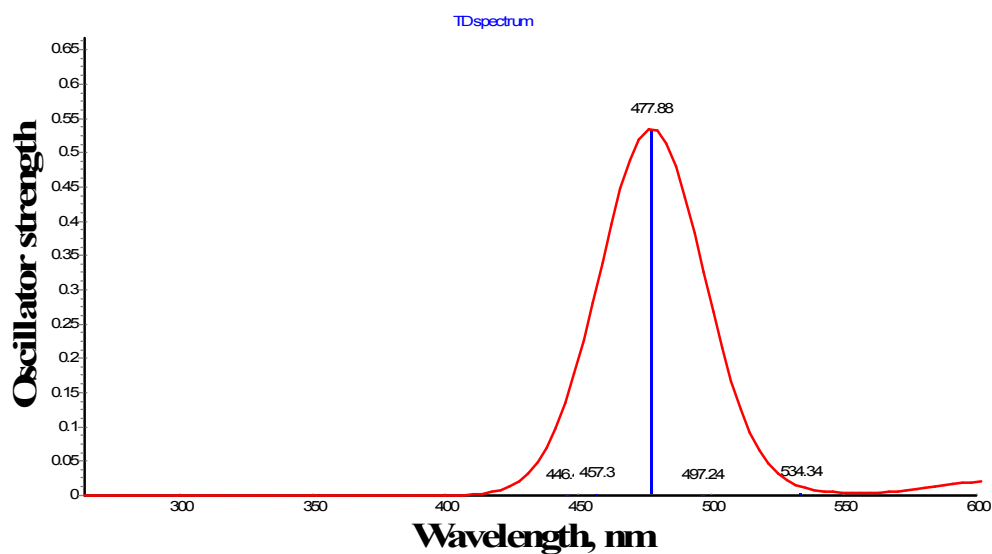

**Figure S30.** TD-DFT derived absorption spectra of PTCA-As<sup>5+</sup> complex (isocontour at 0.03 au).

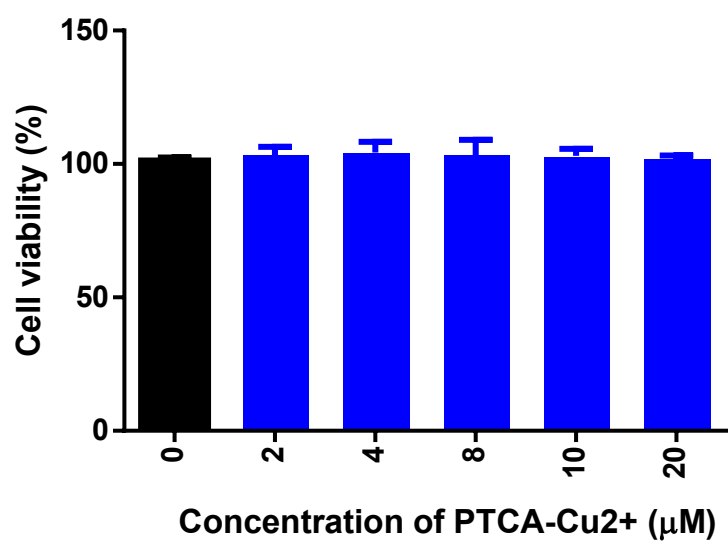

**Figure S31.** Effect of PTCA-Cu<sup>2+</sup> on HepG2 cells viability. (a) HepG2 cells were exposed to different doses of PTCA-Cu<sup>2+</sup> for 24h and MTT assay were performed to determine the viability. Viability was represented as percentage (%) of control. All data were represented as Mean  $\pm$  SE (Standard Error) of two-three independent experiments in triplicate.
